# Supplementary material for: Exposure to cold but not exercise increases carbon turnover rates in specific tissues of a passerine
Source: Oxford University Press journal article supplement (doi:10.1242/jeb.037408), 2010-01-19
Supplement: jeb037408tables1.pdf [file jeb037408tables1.pdf]

Table S1. Incorporation of  $^{13}\text{C}$  into 12 tissues for the three experimental groups described by one- and two-compartment models that were fitted for tissue specific  $\delta^{13}\text{C}$  values collected over 256 days after a diet shift

| Tissue                       | Group    | One-compartment model <sup>1</sup>                   |        |            |        |      |        | Two-compartment model <sup>2</sup>                                   |        |            |        |            |        |       |        |      |        |      |        |          |        |          |        |          |        |          |        |                           |
|------------------------------|----------|------------------------------------------------------|--------|------------|--------|------|--------|----------------------------------------------------------------------|--------|------------|--------|------------|--------|-------|--------|------|--------|------|--------|----------|--------|----------|--------|----------|--------|----------|--------|---------------------------|
|                              |          | $y_t = y_\infty + a e^{-(t/\tau_{\text{one-comp}})}$ |        |            |        |      |        | $y_t = y_\infty + a(p_1 e^{-(t/\tau_1)} + a(1-p_1) e^{-(t/\tau_2)})$ |        |            |        |            |        |       |        |      |        |      |        |          |        |          |        |          |        |          |        |                           |
|                              |          | $y_\infty$                                           | s.e.m. | $y_\infty$ | s.e.m. | $a$  | s.e.m. | $\tau_{\text{one-comp.}}$                                            | s.e.m. | $y_\infty$ | s.e.m. | $y_\infty$ | s.e.m. | $a$   | s.e.m. | $p$  | s.e.m. | $p$  | s.e.m. | $\tau_1$ | s.e.m. | $\tau_1$ | s.e.m. | $\tau_2$ | s.e.m. | $\tau_2$ | s.e.m. | $\tau_{\text{two-comp.}}$ |
| Small intestine <sup>2</sup> | Control  | -23.36                                               | 0.19   | 8.85       | 8.85   | 3.8  | 0.5    | -23.86                                                               | 0.29   | 9.60       | 0.46   | 0.30       | 0.11   | 21.6  | 11.9   | 2.2  | 0.61   | 8.0  | 2.5    |          |        |          |        |          |        |          |        |                           |
|                              | Exercise | -23.61                                               | 0.21   | 9.41       | 0.51   | 3.2  | 0.5    | -23.88                                                               | 0.32   | 9.89       | 0.53   | 0.25       | 0.13   | 19.9  | 15.2   | 2.1  | 0.6    | 6.5  | 2.6    |          |        |          |        |          |        |          |        |                           |
|                              | Cold     | -23.23                                               | 0.15   | 8.89       | 0.38   | 2.3  | 0.2    | -23.71                                                               | 0.21   | 9.56       | 0.36   | 0.26       | 0.06   | 19.1  | 8.0    | 1.4  | 0.3    | 6.0  | 1.7    |          |        |          |        |          |        |          |        |                           |
| Gizzard <sup>2</sup>         | Control  | -22.53                                               | 0.21   | 9.20       | 0.37   | 7.6  | 0.9    | -22.88                                                               | 0.23   | 10.26      | 0.42   | 0.62       | 0.11   | 15.1  | 3.7    | 1.6  | 0.8    | 10.0 | 3.8    |          |        |          |        |          |        |          |        |                           |
|                              | Exercise | -22.64                                               | 0.20   | 9.61       | 0.37   | 8.4  | 1.0    | -22.90                                                               | 0.26   | 10.32      | 0.47   | 0.60       | 0.23   | 15.2  | 5.7    | 2.7  | 1.8    | 10.2 | 1.8    |          |        |          |        |          |        |          |        |                           |
|                              | Cold     | -22.53                                               | 0.16   | 9.80       | 0.37   | 4.2  | 0.4    | -22.90                                                               | 0.23   | 10.40      | 0.39   | 0.30       | 0.14   | 17.7  | 9.1    | 2.6  | 0.7    | 7.2  | 1.7    |          |        |          |        |          |        |          |        |                           |
| Pancreas <sup>2</sup>        | Control  | -23.11                                               | 0.20   | 10.04      | 0.38   | 6.8  | 0.8    | -23.69                                                               | 0.21   | 11.44      | 0.38   | 0.52       | 0.08   | 18.4  | 3.8    | 2.0  | 0.6    | 10.6 | 2.6    |          |        |          |        |          |        |          |        |                           |
|                              | Exercise | -23.26                                               | 0.20   | 10.49      | 0.42   | 6.7  | 0.8    | -23.81                                                               | 0.30   | 11.53      | 0.50   | 0.38       | 0.14   | 22.9  | 10.0   | 3.3  | 1.1    | 10.8 | 2.3    |          |        |          |        |          |        |          |        |                           |
|                              | Cold     | -23.35                                               | 0.18   | 10.50      | 0.43   | 4.6  | 0.5    | -23.80                                                               | 0.20   | 11.65      | 0.38   | 0.44       | 0.08   | 16.5  | 4.0    | 1.8  | 0.4    | 8.2  | 1.2    |          |        |          |        |          |        |          |        |                           |
| Kidney <sup>2</sup>          | Control  | -23.53                                               | 0.19   | 9.35       | 0.32   | 9.2  | 1.0    | -23.89                                                               | 0.20   | 10.47      | 0.35   | 0.68       | 0.08   | 16.3  | 2.8    | 1.6  | 0.7    | 11.6 | 3.0    |          |        |          |        |          |        |          |        |                           |
|                              | Exercise | -23.49                                               | 0.14   | 9.76       | 0.26   | 7.5  | 0.7    | -23.78                                                               | 0.16   | 10.47      | 0.29   | 0.54       | 0.15   | 15.4  | 4.1    | 2.8  | 1.0    | 9.7  | 1.1    |          |        |          |        |          |        |          |        |                           |
|                              | Cold     | -23.58                                               | 0.17   | 9.83       | 0.33   | 6.9  | 0.7    | -23.91                                                               | 0.22   | 10.50      | 0.39   | 0.49       | 0.21   | 15.9  | 6.2    | 3.1  | 1.4    | 9.4  | 1.5    |          |        |          |        |          |        |          |        |                           |
| Liver <sup>2</sup>           | Control  | -23.16                                               | 0.22   | 9.68       | 0.43   | 5.8  | 0.7    | -23.93                                                               | 0.24   | 11.10      | 0.40   | 0.45       | 0.07   | 23.9  | 6.0    | 2.1  | 0.5    | 11.9 | 1.9    |          |        |          |        |          |        |          |        |                           |
|                              | Exercise | -23.21                                               | 0.17   | 9.86       | 0.35   | 5.8  | 0.6    | -23.92                                                               | 0.23   | 11.03      | 0.36   | 0.35       | 0.08   | 29.8  | 9.5    | 2.9  | 0.6    | 12.2 | 2.3    |          |        |          |        |          |        |          |        |                           |
|                              | Cold     | -23.34                                               | 0.15   | 10.20      | 0.32   | 4.4  | 0.4    | -23.96                                                               | 0.18   | 11.11      | 0.29   | 0.28       | 0.06   | 27.5  | 8.8    | 2.7  | 0.4    | 9.6  | 1.7    |          |        |          |        |          |        |          |        |                           |
| Proventriculus <sup>2</sup>  | Control  | -22.90                                               | 0.21   | 9.74       | 0.38   | 7.4  | 0.9    | -23.66                                                               | 0.21   | 11.23      | 0.34   | 0.50       | 0.07   | 2.3   | 0.5    | 24.6 | 5.0    | 13.3 | 1.7    |          |        |          |        |          |        |          |        |                           |
|                              | Exercise | -22.73                                               | 0.21   | 9.81       | 0.42   | 6.4  | 0.8    | -23.81                                                               | 0.31   | 11.42      | 0.44   | 0.36       | 0.06   | 41.3  | 14.0   | 3.0  | 0.6    | 17.0 | 3.9    |          |        |          |        |          |        |          |        |                           |
|                              | Cold     | -23.04                                               | 0.19   | 9.98       | 0.49   | 5.2  | 0.6    | -23.65                                                               | 0.23   | 11.35      | 0.49   | 0.39       | 0.08   | 22.2  | 6.5    | 2.2  | 0.6    | 10.1 | 1.8    |          |        |          |        |          |        |          |        |                           |
| Heart <sup>2</sup>           | Control  | -23.75                                               | 0.20   | 9.99       | 0.27   | 17.2 | 1.4    | -23.83                                                               | 0.20   | 10.60      | 0.37   | 0.91       | 0.04   | 18.7  | 1.7    | 0.2  | 2.0    | 17.0 | 1.4    |          |        |          |        |          |        |          |        |                           |
|                              | Exercise | -23.49                                               | 0.22   | 9.85       | 0.31   | 14.8 | 1.5    | -23.89                                                               | 0.27   | 10.75      | 0.39   | 0.41       | 0.18   | 4.7   | 2.5    | 27.4 | 8.8    | 18.1 | 2.7    |          |        |          |        |          |        |          |        |                           |
|                              | Cold     | -23.48                                               | 0.21   | 9.31       | 0.33   | 12.0 | 1.3    | -23.91                                                               | 0.19   | 10.61      | 0.31   | 0.64       | 0.07   | 22.2  | 3.4    | 2.2  | 0.7    | 15.0 | 1.5    |          |        |          |        |          |        |          |        |                           |
| Brain <sup>2</sup>           | Control  | -22.66                                               | 0.35   | 9.48       | 0.46   | 18.5 | 2.6    | -24.42                                                               | 3.50   | 11.50      | 3.46   | 0.34       | 0.13   | 172.7 | 349.6  | 11.5 | 3.7    | 65.5 | 131.0  |          |        |          |        |          |        |          |        |                           |
|                              | Exercise | -22.70                                               | 0.34   | 9.51       | 0.43   | 22.6 | 2.9    | -23.11                                                               | 0.41   | 10.64      | 0.59   | 0.70       | 0.12   | 35.4  | 9.8    | 3.4  | 2.5    | 26.0 | 4.6    |          |        |          |        |          |        |          |        |                           |
|                              | Cold     | -22.60                                               | 0.33   | 9.23       | 0.46   | 14.5 | 2.3    | -23.12                                                               | 0.38   | 10.57      | 0.57   | 0.57       | 0.16   | 31.2  | 12.2   | 3.4  | 2.0    | 19.2 | 4.2    |          |        |          |        |          |        |          |        |                           |
| RBC <sup>1</sup>             | Control  | -24.20                                               | 0.41   | 11.10      | 0.53   | 19.3 | 2.6    | -24.48                                                               | 2.6    | 11.42      | *      | 0.00       | *      | 19.5  | *      | 19.5 | *      | 19.5 | *      |          |        |          |        |          |        |          |        |                           |
|                              | Exercise | -24.13                                               | 0.34   | 11.29      | 0.47   | 16.8 | 2.2    | -24.37                                                               | 2.2    | 11.55      | *      | 1.00       | *      | 17.0  | *      | -    | *      | 17.0 | *      |          |        |          |        |          |        |          |        |                           |
|                              | Cold     | -24.43                                               | 0.28   | 11.05      | 0.38   | 15.9 | 1.6    | -24.43                                                               | 1.6    | 11.05      | *      | 1.00       | *      | 15.9  | *      | -    | *      | 15.9 | *      |          |        |          |        |          |        |          |        |                           |
| Flight muscle <sup>2</sup>   | Control  | -23.63                                               | 0.26   | 9.43       | 0.33   | 20.9 | 2.1    | -23.74                                                               | 0.27   | 10.14      | 0.46   | 0.86       | 0.07   | 24.1  | 3.3    | 1.3  | 1.4    | 21.0 | 2.3    |          |        |          |        |          |        |          |        |                           |
|                              | Exercise | -23.44                                               | 0.27   | 9.38       | 0.35   | 20.3 | 2.2    | -23.87                                                               | 0.31   | 10.52      | 0.43   | 0.62       | 0.12   | 36.3  | 10.2   | 4.4  | 2.1    | 24.2 | 3.9    |          |        |          |        |          |        |          |        |                           |
|                              | Cold     | -23.39                                               | 0.30   | 8.84       | 0.41   | 15.0 | 2.1    | -23.84                                                               | 0.26   | 10.36      | 0.41   | 0.58       | 0.09   | 30.4  | 7.1    | 2.6  | 1.0    | 18.8 | 2.8    |          |        |          |        |          |        |          |        |                           |
| Leg muscle <sup>2</sup>      | Control  | -23.32                                               | 0.35   | 9.99       | 0.42   | 26.0 | 2.9    | -23.47                                                               | 0.35   | 11.02      | 0.57   | 0.84       | 0.06   | 30.6  | 4.5    | 1.0  | 1.0    | 25.9 | 3.1    |          |        |          |        |          |        |          |        |                           |
|                              | Exercise | -23.36                                               | 0.31   | 10.23      | 0.38   | 28.3 | 2.8    | -23.60                                                               | 0.34   | 11.17      | 0.50   | 0.81       | 0.08   | 35.8  | 5.9    | 2.4  | 1.9    | 29.4 | 3.5    |          |        |          |        |          |        |          |        |                           |
|                              | Cold     | -23.19                                               | 0.38   | 9.71       | 0.49   | 21.9 | 3.1    | -23.69                                                               | 0.42   | 11.38      | 0.57   | 0.60       | 0.10   | 42.2  | 13.4   | 3.3  | 1.6    | 26.8 | 5.6    |          |        |          |        |          |        |          |        |                           |
| Skin <sup>2</sup>            | Control  | -21.52                                               | 0.46   | 8.86       | 0.56   | 24.2 | 4.1    | -21.78                                                               | 0.49   | 10.27      | 0.81   | 0.76       | 0.10   | 32.3  | 8.0    | 1.4  | 1.3    | 25.0 | 5.0    |          |        |          |        |          |        |          |        |                           |
|                              | Exercise | -21.22                                               | 0.57   | 8.34       | 0.68   | 28.7 | 6.1    | -23.73                                                               | 2.37   | 12.17      | 2.38   | 0.57       | 0.07   | 141.4 | 111.6  | 4.4  | 1.9    | 82.1 | 67.3   |          |        |          |        |          |        |          |        |                           |
|                              | Cold     | -20.17                                               | 0.34   | 8.36       | 0.73   | 5.8  | 1.3    | -24.37                                                               | 3.91   | 12.91      | 3.90   | 0.47       | 0.13   | 207.0 | 241.6  | 3.3  | 0.8    | 99.8 | 139.2  |          |        |          |        |          |        |          |        |                           |

Based on  $\Delta_{\text{one-two}} (=AIC_{\text{one-comp.}} - AIC_{\text{two-comp.}})$  presented in Table 2 we used average retention time ( $\tau_{\text{one-comp.}}$ ) for RBC, and ( $\tau_{\text{two-comp.}}$ ) for all other tissues to perform subsequent analyses.  $y_t$  is the measured  $\delta^{13}\text{C}$  value of the tissue at time  $t$ .

$t$  is the time in days.

$y_\infty$  is the estimated final  $\delta^{13}\text{C}$  value.

$a$  is the estimated range in tissue  $\delta^{13}\text{C}$  between diets.

$p_1$  and  $p_2$  are the fractional size of pools one and two for the two-compartment model.

$\tau_{\text{one-comp.}}$  is the estimated average carbon retention time for the one-compartment model.

$\tau_1$  and  $\tau_2$  are the estimated average carbon retention times for 1st and 2nd pool of the two-compartment model.

$\tau_{\text{two-comp.}}$  is the average carbon retention time of the two-compartment model:  $\tau_{\text{two-comp.}} = p\tau_1 + (1-p)\tau_2$  (Carleton et al., 2008).

<sup>1</sup> Average retention time from the one-compartment model was used because  $\Delta_{1-2} < 2$ .

<sup>2</sup> Average retention time from the two-compartment model was used because  $\Delta_{1-2} > 2$ .

\*Nan error, no adequate curve fitting possible,  $p_1$  and  $p_2$  indicate this is a single pool model.
