# Supplementary figures and images for: Exposure to cold but not exercise increases carbon turnover rates in specific tissues of a passerine
Source: Oxford University Press journal article supplement (doi:10.1242/jeb.037408), 2010-01-19

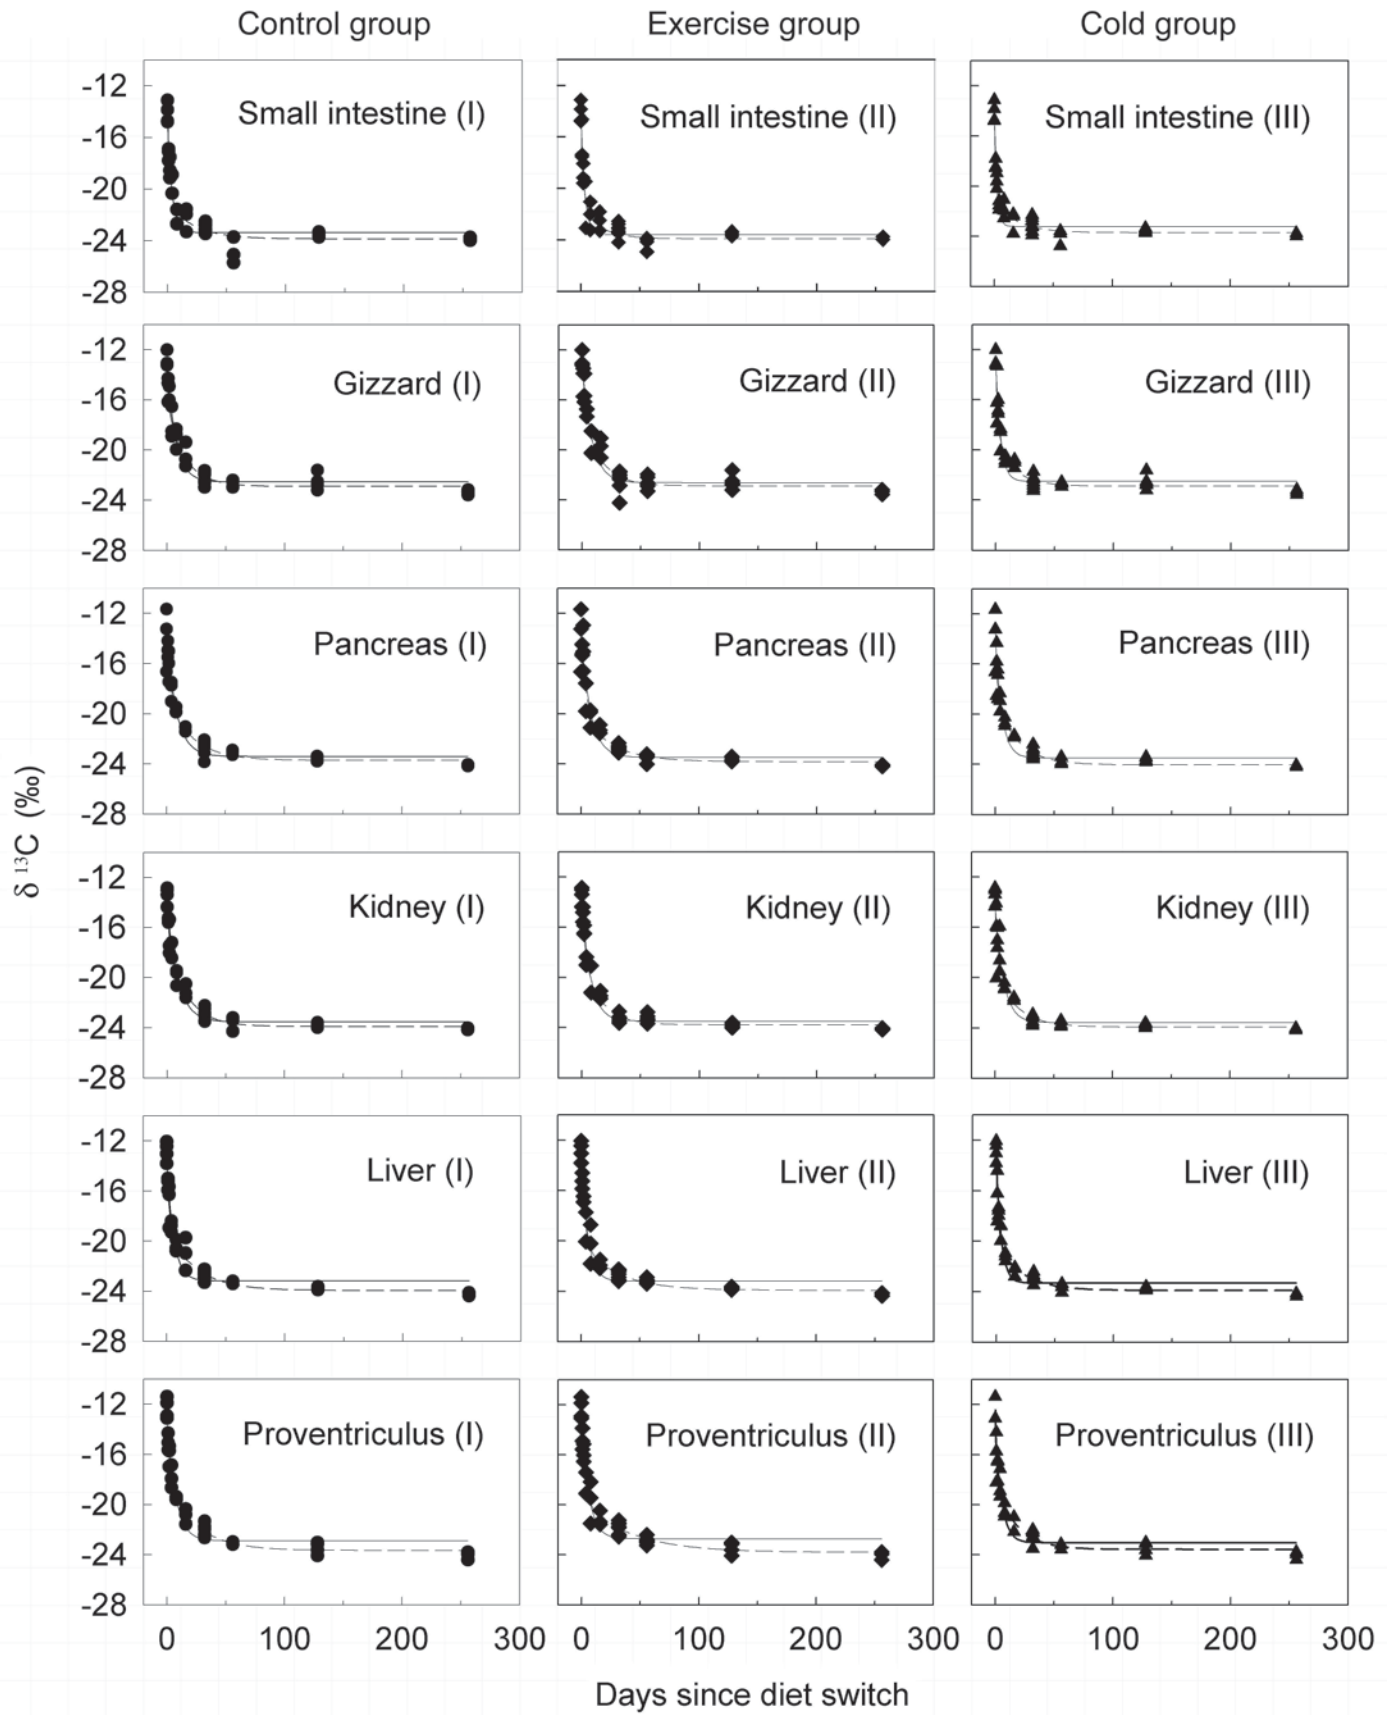

Supplement: jeb037408-sup-037408figs1a.pdf [file jeb037408-sup-037408figs1a.pdf]

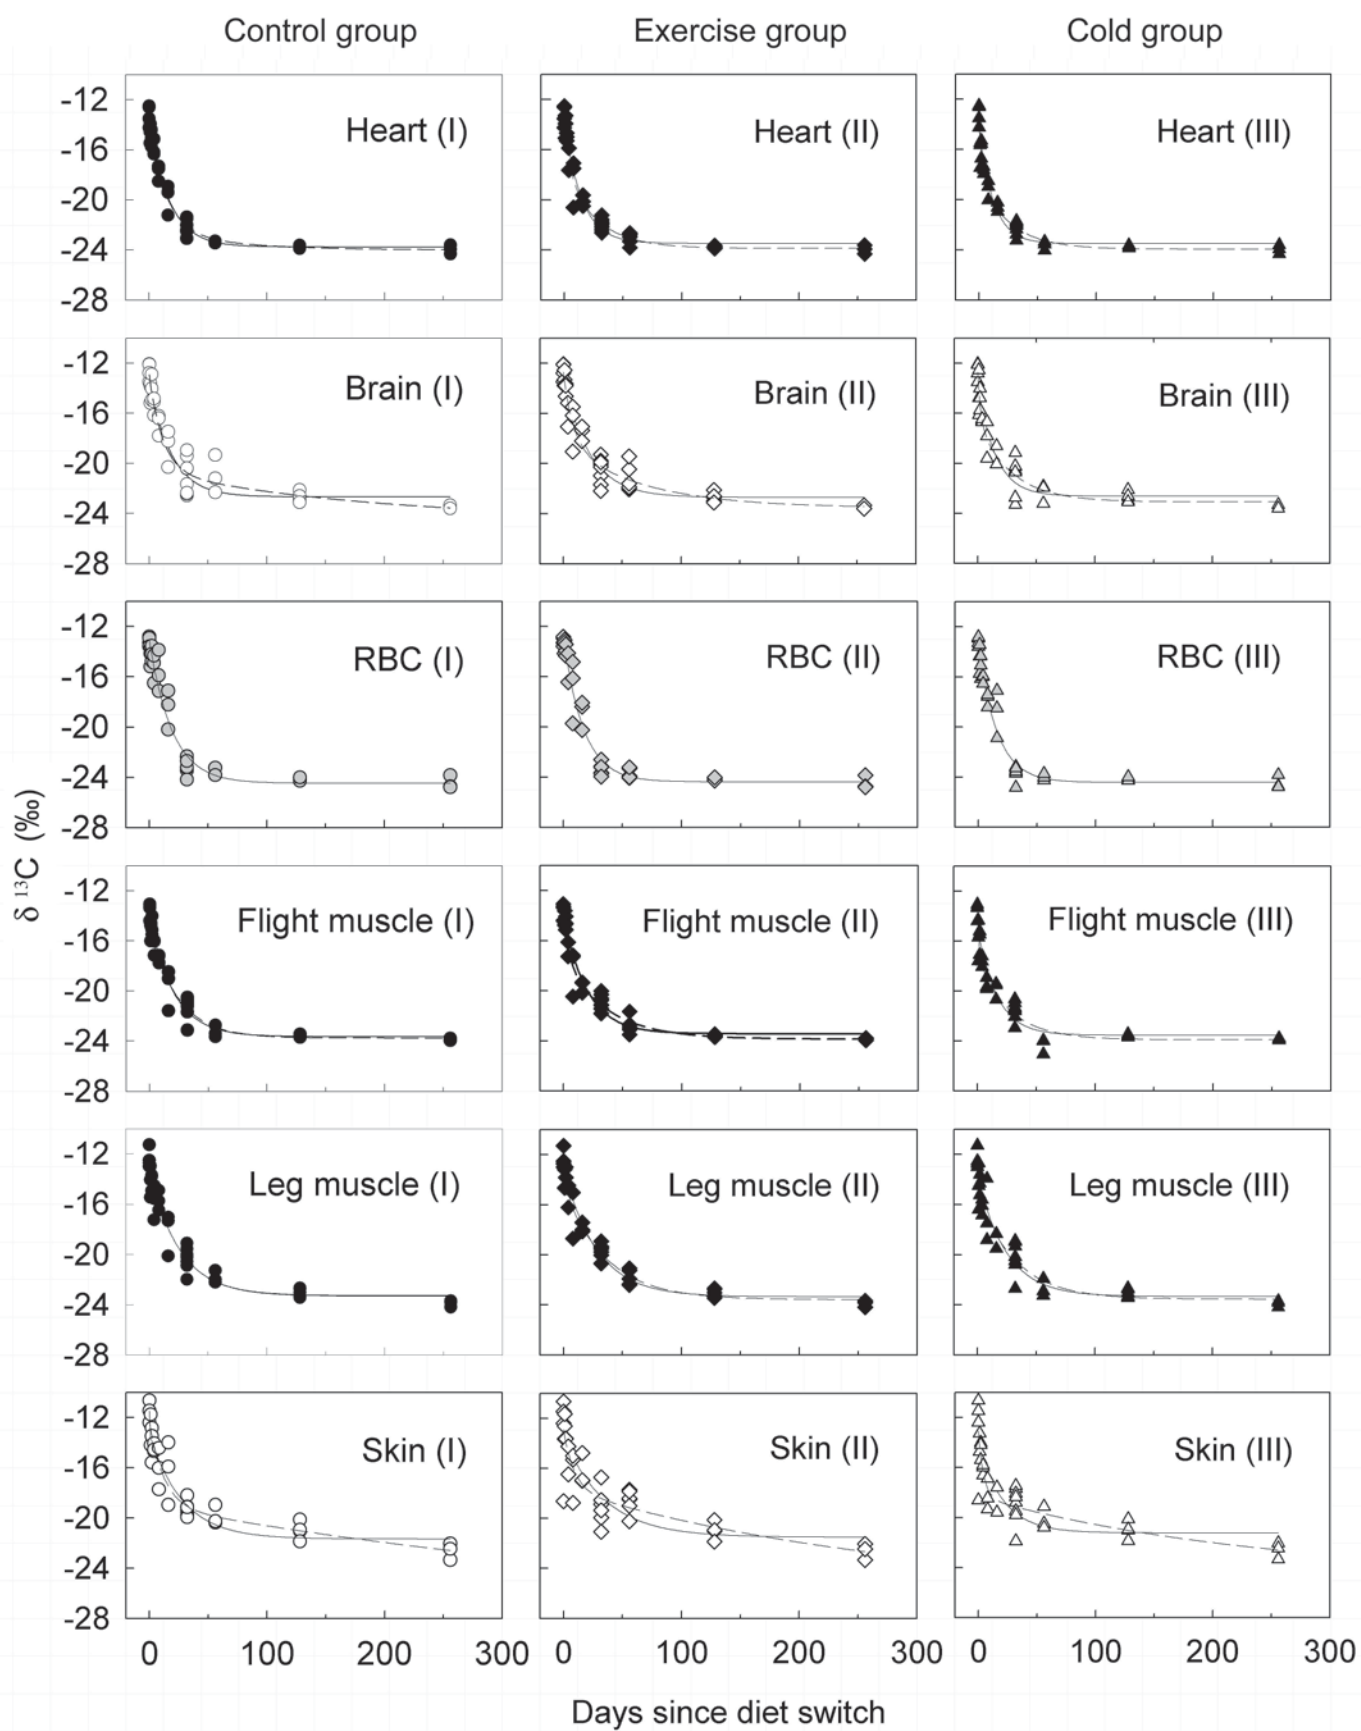

Supplement: jeb037408-sup-037408figs1b.pdf [file jeb037408-sup-037408figs1b.pdf]

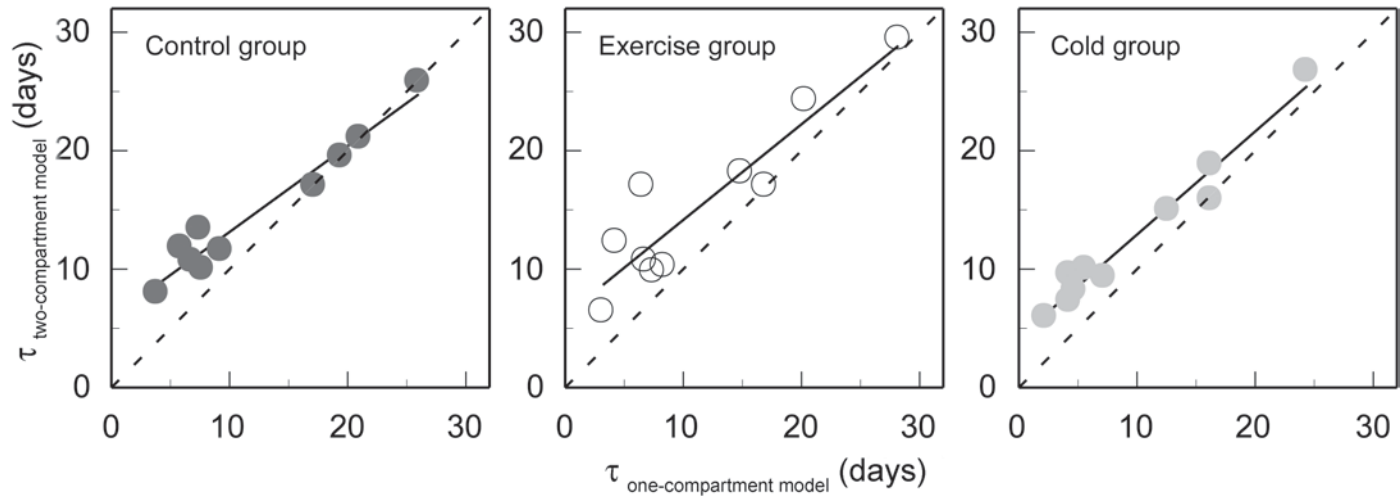

Supplement: jeb037408-sup-037408figs2.pdf [file jeb037408-sup-037408figs2.pdf]
